# Supplementary material
Source: publisher figshare collection journal article supplement (https://acs.figshare.com/ndownloader/files/4165126)
Supplement: Supplementary file 1 [file 4165126]

# Removal of Thiophenic Sulfurs Using Extractive Oxidative Desulfurization Process with Three New Phosphotungstate Catalysts

Hongxing Zhang<sup>†,‡</sup>, Jiajun Gao<sup>†,‡</sup>, Hong Meng<sup>‡</sup>, and Chun-Xi Li<sup>\*†,‡</sup>

<sup>†</sup> State Key Laboratory of Chemical Resource Engineering, Beijing University of Chemical Technology, Beijing 100029, P. R. China, <sup>‡</sup> College of Chemical Engineering, Beijing University of Chemical Technology, Beijing 100029, P. R. China

\* Author to whom correspondence should be addressed: licx@mail.buct.edu.cn; Tel. & Fax: +86-10-6441-0308

## SUPPORTING INFORMATION

**Table 1s** Comparison of the reactivity between the present ECODS system and other literatures

| References                              | Present work          |                       |                       | (10)                  | (19)                  | (23)                  | (26)                  |
|-----------------------------------------|-----------------------|-----------------------|-----------------------|-----------------------|-----------------------|-----------------------|-----------------------|
| S-removal rate (%)                      | 99.8                  | 99.7                  | 99.8                  | 99.2                  | 98.6                  | 99.0                  | 100                   |
| $m(\text{oil})/m(\text{IL})^c$          | 4:1                   | 4:1                   | 4:1                   | 2.57:1 <sup>b</sup>   | 1.56:1 <sup>b</sup>   | 3.13:1 <sup>b</sup>   | 2.87:1 <sup>b</sup>   |
| $n(\text{H}_2\text{O}_2)/n(\text{S})^c$ | 3:1                   | 3:1                   | 3:1                   | 4:1                   | 10:1                  | 4:1                   | 4:1                   |
| $n(\text{S})/n(\text{Catalyst})$        | 100:1                 | 100:1                 | 100:1                 | 10:1                  | 25:1                  | 20:1                  | 120:1                 |
| Temperature (°C)                        | 40                    | 40                    | 40                    | 70                    | 70                    | 70                    | 30                    |
| Time (h)                                | 1.5                   | 1                     | 1.5                   | 3                     | 3                     | 3                     | 1                     |
| Ionic Liquid                            | [Bmim]PF <sub>6</sub> | [Bmim]PF <sub>6</sub> | [Bmim]PF <sub>6</sub> | [Bmim]PF <sub>6</sub> | [Bmim]BF <sub>4</sub> | [Bmim]BF <sub>4</sub> | [Omim]PF <sub>6</sub> |
| Catalyst <sup>a</sup>                   | I                     | II                    | III                   | IV                    | V                     | VI                    | VII                   |
| S-content (ppm)                         | 1000                  | 1000                  | 1000                  | 1000                  | 1000                  | 1000                  | 500                   |

<sup>a</sup> Catalyst I = [C<sub>5</sub>H<sub>5</sub>NH]<sub>3</sub>PW<sub>12</sub>O<sub>40</sub>, II = [C<sub>4</sub>H<sub>6</sub>N<sub>2</sub>H]<sub>3</sub>PW<sub>12</sub>O<sub>40</sub>·3C<sub>4</sub>H<sub>6</sub>N<sub>2</sub>, III = [(C<sub>4</sub>H<sub>9</sub>)<sub>4</sub>N]<sub>3</sub>PW<sub>12</sub>O<sub>40</sub>, IV = MoO(O<sub>2</sub>)<sub>2</sub>·C<sub>2</sub>H<sub>5</sub>NO<sub>2</sub>, V = WO(O<sub>2</sub>)<sub>2</sub>·Phen·H<sub>2</sub>O, VI = Na<sub>2</sub>MoO<sub>4</sub>, VII = [MIMPS]<sub>3</sub>PW<sub>12</sub>O<sub>40</sub> (MIMPS = 1-(3-sulfonic group) propyl-3-methyl imidazolium); <sup>b</sup> The calculated results of mass ratio of  $m(\text{oil})/m(\text{IL})$  are based on the densities of *n*-octane (0.70 g/cm<sup>3</sup>)<sup>1</sup>, [Bmim]PF<sub>6</sub> (1.36 g/cm<sup>3</sup>)<sup>2</sup>, [Bmim]BF<sub>4</sub> (1.12 g/cm<sup>3</sup>)<sup>2</sup>, and [Omim]PF<sub>6</sub> (1.22 g/cm<sup>3</sup>)<sup>2</sup>; <sup>c</sup> *m* means mass and *n* means mole.

\* To whom correspondence should be addressed. E-mail: licx@mail.buct.edu.cn, Tel. & Fax: +86 10 64410308.

<sup>†</sup> State Key Lab of Chemical Resource Engineering.

<sup>‡</sup> College of Chemical Engineering.

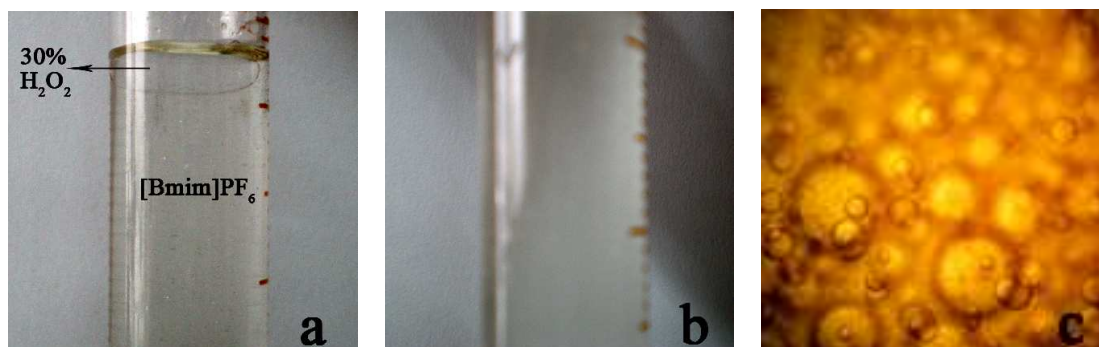

**Figure 1s.** The photographs of formed water-in-IL emulsion system. (a): 30 %  $\text{H}_2\text{O}_2$  liquid film suspended on  $[\text{Bmim}]\text{PF}_6$  IL with dissolved catalyst  $[\text{C}_5\text{H}_5\text{NH}]_3\text{PW}_{12}\text{O}_{40}$ ; (b): the emulsion system formed under vigorous stirring; (c) optical micrograph of the water-in-IL emulsion system.

## REFERENCES:

- (1) Huddleston, J. G.; Visser, A. E.; Reichert, W. M.; Willauer, H. D. Characterization and comparison of hydrophilic and hydrophobic room temperature ionic liquids incorporating the imidazolium cation. *Green Chem.* 2001, 3, 156-164.
- (2) Ramos-Estrada, M.; Iglesia-Silva, G. A.; Hall, K. R.; Castillo-Borja, F. Experimental Liquid Densities of n-Pentane, n-Octane, and n-Nonane and Their Binary Mixtures from (273.15 to 363.15) K at 0.1 MPa. *J. Chem. Eng. Data.* 2011, 56, 4461-4465.
